# Supplementary material
Source: publisher figshare collection journal article supplement (https://gsapubs.figshare.com/ndownloader/files/38066766)
Supplement: Supplementary file 1 [file 38066766]

## Sheet: Sheet1
TABLE S1. MODIFIED AGE MODEL OF OCEAN DRILLING PROGRAM (ODP) SITE 1262: WALVIS RIDGE (WESTERHOLD ET AL., 2020)
Depth	Age tuned	Original source	Published, Note
(mcd)	(Ma)
164.46	58.003	Westerhold et al. (2008)	Westerhold et al. 2020 Barnet et al. 2019, Updated to La2010b
168.6	58.474	Westerhold et al. (2008)	Westerhold et al. 2020 Barnet et al. 2019, Updated to La2010b
169.53	58.581	Westerhold et al. (2008)	Westerhold et al. 2020 Barnet et al. 2019, Updated to La2010b
170.7	58.75	Westerhold et al. (2008)	Westerhold et al. 2020 Barnet et al. 2019, Updated to La2010b
171.47	58.854	Westerhold et al. (2008)	Westerhold et al. 2020 Barnet et al. 2019, Updated to La2010b
171.95	58.958	Westerhold et al. (2008)	Westerhold et al. 2020 Barnet et al. 2019, Updated to La2010b
173.03	59.139	Westerhold et al. (2008)	Westerhold et al. 2020 Barnet et al. 2019, Updated to La2010b
173.51	59.238	Westerhold et al. (2008)	Westerhold et al. 2020 Barnet et al. 2019, Updated to La2010b
175.25	59.619	Westerhold et al. (2008)	Westerhold et al. 2020 Barnet et al. 2019, Updated to La2010b
176.06	59.725	Westerhold et al. (2008)	Westerhold et al. 2020 Barnet et al. 2019, Updated to La2010b
177.77	60.007	Westerhold et al. (2008)	Westerhold et al. 2020 Barnet et al. 2019, Updated to La2010b
178.34	60.106	Westerhold et al. (2008)	Westerhold et al. 2020 Barnet et al. 2019, Updated to La2010b
179.99	60.293	Westerhold et al. (2008)	Westerhold et al. 2020 Barnet et al. 2019, Updated to La2010b
180.78	60.38	Westerhold et al. (2008)	Westerhold et al. 2020 Barnet et al. 2019, Updated to La2010b
181.68	60.478	Westerhold et al. (2008)	Westerhold et al. 2020 Barnet et al. 2019, Updated to La2010b
184.44	60.855	Westerhold et al. (2008)	Westerhold et al. 2020 Barnet et al. 2019, Updated to La2010b
185.47	60.96	Westerhold et al. (2008)	Westerhold et al. 2020 Barnet et al. 2019, Updated to La2010b
187.92	61.243	Westerhold et al. (2008)	Westerhold et al. 2020 Barnet et al. 2019, Updated to La2010b
188.64	61.346	Westerhold et al. (2008)	Westerhold et al. 2020 Barnet et al. 2019, Updated to La2010b
191.26	61.62	Dinarès-Turell et al. (2014)	Westerhold et al. 2020 Barnet et al. 2019, Updated to La2010b
192.04	61.722	Dinarès-Turell et al. (2014)	Westerhold et al. 2020 Barnet et al. 2019, Updated to La2010b
194.44	62.005	Dinarès-Turell et al. (2014)	Westerhold et al. 2020 Barnet et al. 2019, Updated to La2010b
195.31	62.107	Dinarès-Turell et al. (2014)	Westerhold et al. 2020 Barnet et al. 2019, Updated to La2010b
196.77	62.301	Dinarès-Turell et al. (2014)	Westerhold et al. 2020 Barnet et al. 2019, Updated to La2010b
198.96	62.586	Dinarès-Turell et al. (2014)	Westerhold et al. 2020 Barnet et al. 2019, Updated to La2010b
200.73	62.851	Dinarès-Turell et al. (2014)	Westerhold et al. 2020 Barnet et al. 2019, Updated to La2010b
201.57	62.957	Dinarès-Turell et al. (2014)	Westerhold et al. 2020 Barnet et al. 2019, Updated to La2010b
203.22	63.24	Dinarès-Turell et al. (2014)	Westerhold et al. 2020 Barnet et al. 2019, Updated to La2010b
203.73	63.348	Dinarès-Turell et al. (2014)	Westerhold et al. 2020 Barnet et al. 2019, Updated to La2010b
205.38	63.72	Dinarès-Turell et al. (2014)	Westerhold et al. 2020 Barnet et al. 2019, Updated to La2010b
206.7	64.003	Dinarès-Turell et al. (2014)	Westerhold et al. 2020 Barnet et al. 2019, Updated to La2010b
207.18	64.103	Dinarès-Turell et al. (2014)	Westerhold et al. 2020 Barnet et al. 2019, Updated to La2010b
208.2	64.307	Dinarès-Turell et al. (2014)	Westerhold et al. 2020 Barnet et al. 2019, Updated to La2010b
208.83	64.411	Dinarès-Turell et al. (2014)	Westerhold et al. 2020 Barnet et al. 2019, Updated to La2010b
210.81	64.834	Dinarès-Turell et al. (2014)	Westerhold et al. 2020 Barnet et al. 2019, Updated to La2010b
211.36	64.942	Dinarès-Turell et al. (2014)	Westerhold et al. 2020 Barnet et al. 2019, Updated to La2010b
211.77	65.035	Dinarès-Turell et al. (2014)	Westerhold et al. 2020 Barnet et al. 2019, Updated to La2010b
212.39	65.132	Dinarès-Turell et al. (2014)	Westerhold et al. 2020 Barnet et al. 2019, Updated to La2010b
213.05	65.225	Dinarès-Turell et al. (2014)	Westerhold et al. 2020 Barnet et al. 2019, Updated to La2010b
213.31	65.329	Dinarès-Turell et al. (2014)	Westerhold et al. 2020 Barnet et al. 2019, Updated to La2010b
213.91	65.434	Dinarès-Turell et al. (2014)	Westerhold et al. 2020 Barnet et al. 2019, Updated to La2010b
214.37	65.527	Dinarès-Turell et al. (2014)	Westerhold et al. 2020 Barnet et al. 2019, Updated to La2010b
214.79	65.611	Dinarès-Turell et al. (2014)	Westerhold et al. 2020 Barnet et al. 2019, Updated to La2010b
215.21	65.721	Dinarès-Turell et al. (2014)	Westerhold et al. 2020 Barnet et al. 2019, Updated to La2010b
215.46	65.828	Dinarès-Turell et al. (2014)	Westerhold et al. 2020 Barnet et al. 2019, Updated to La2010b
215.93	65.93	Dinarès-Turell et al. (2014)	Westerhold et al. 2020 Barnet et al. 2019, Updated to La2010b
216.28	65.994	Dinarès-Turell et al. (2014)	Westerhold et al. 2020 Barnet et al. 2019, Updated to La2010b
216.71	66.022	Dinarès-Turell et al. (2014); K/Pg	Westerhold et al. 2020 Barnet et al. 2019, Updated to La2010b
216.962	66.0325	CycleCountAge	this study
217.332	66.0535	CycleCountAge	this study
217.92	66.0745	CycleCountAge	this study
218.4	66.0955	CycleCountAge	this study
218.968	66.1165	CycleCountAge	this study
219.46	66.1375	CycleCountAge	this study
219.94	66.1585	CycleCountAge	this study
220.338	66.1795	CycleCountAge	this study
220.76	66.2005	CycleCountAge	this study
221.273	66.2215	CycleCountAge	this study
